# Supplementary material for: Porosity evolution and oxide formation in bulk nanoporous copper dealloyed from a copper–manganese alloy studied by in situ resistometry
Source: Royal Society of Chemistry journal article supplement (doi:10.1039/d2na00618a), 2022-11-28
Supplement: d2na00618a1.pdf [file d2na00618a1.pdf]

## Supplementary Information

### *Porosity evolution and oxide formation in bulk nanoporous copper dealloyed from copper-manganese alloy studied by in situ resistometry*

Elisabeth Hengge<sup>1</sup>, Jakob Ihrenberger<sup>1</sup>, Eva-Maria Steyskal<sup>1</sup>, Ricardo Buzolin<sup>2,3</sup>, Martin Luckabauer<sup>4</sup>, Christof Sommitsch<sup>2</sup>, Roland Würschum<sup>1</sup>

<sup>1</sup> Institute of Materials Physics, Graz University of Technology, Petersgasse 16, A-8010 Graz, Austria

<sup>2</sup> Institute of Materials Science, Joining and Forming, Graz University of Technology, Kopernikusgasse 24, A-8010 Graz, Austria.

<sup>3</sup> Christian Doppler Laboratory for Design of High-Performance Alloys by Thermomechanical Processing, Kopernikusgasse 24, 8010 Graz, Austria.

<sup>4</sup> Department of Mechanics of Solids, Surfaces and Systems, Faculty of Engineering Technology, University of Twente, Drienerlolaan 5, 7522NB Enschede, The Netherlands.

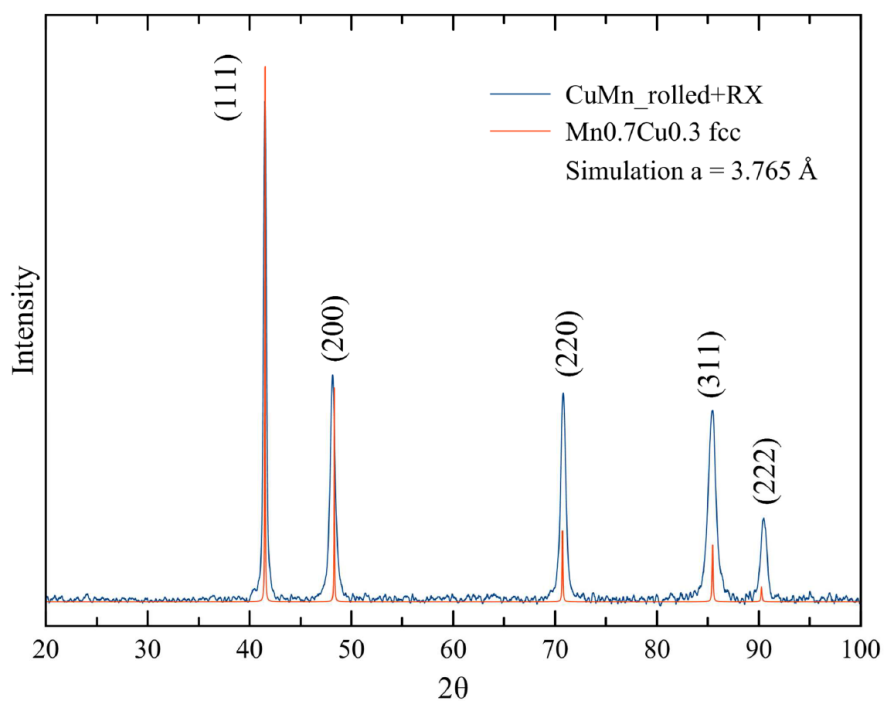

Fig. SI-1: XRD spectrum of the copper-manganese (CuMn) alloy used for dealloying.

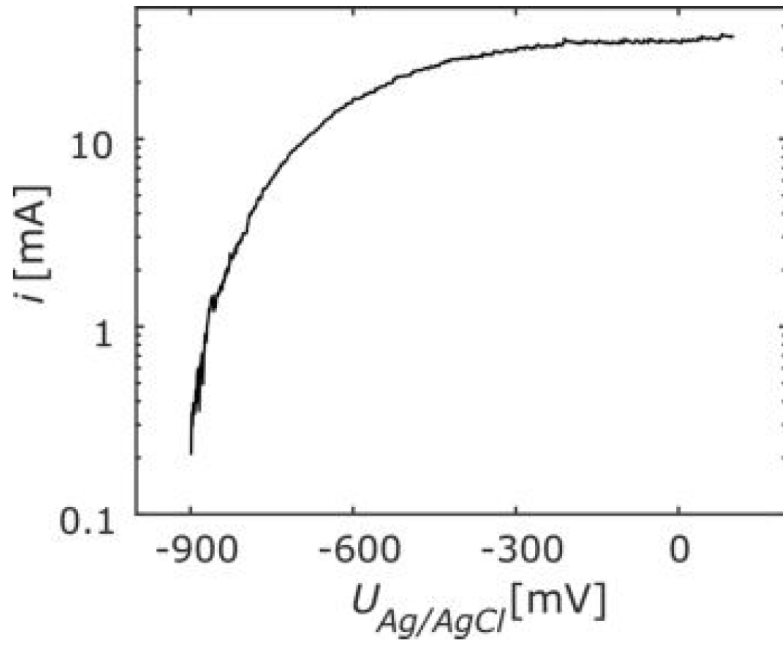

SI-2: Polarization curve of MnCu alloy recorded from -900 mV to +100 mV (vs.Ag/AgCl) in 0.1 M HCl at a scan rate of 0.5 mV/s.

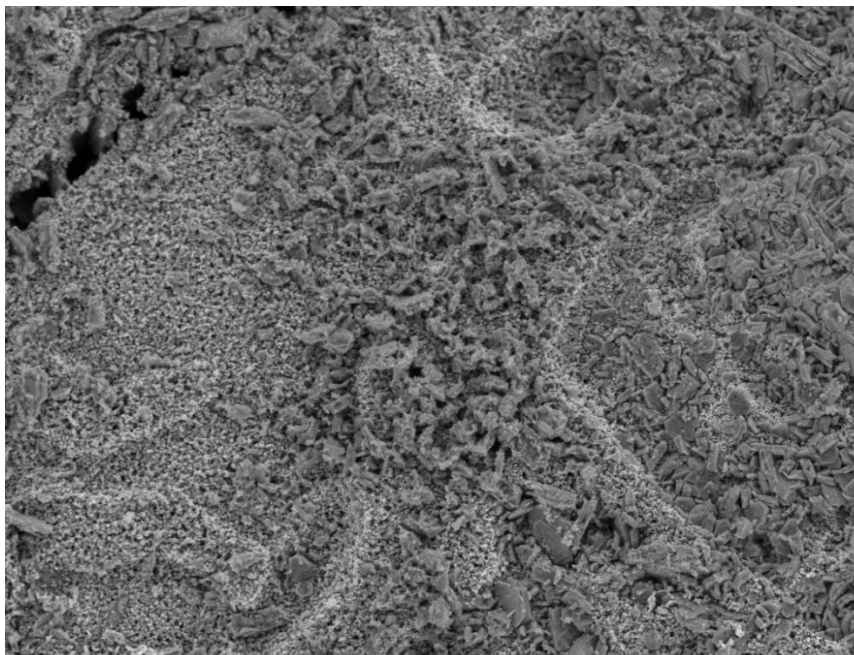

← 10  $\mu$ m →

SI-3: SEM image of sample M-2 showing the inhomogeneous morphology of the porous structure.

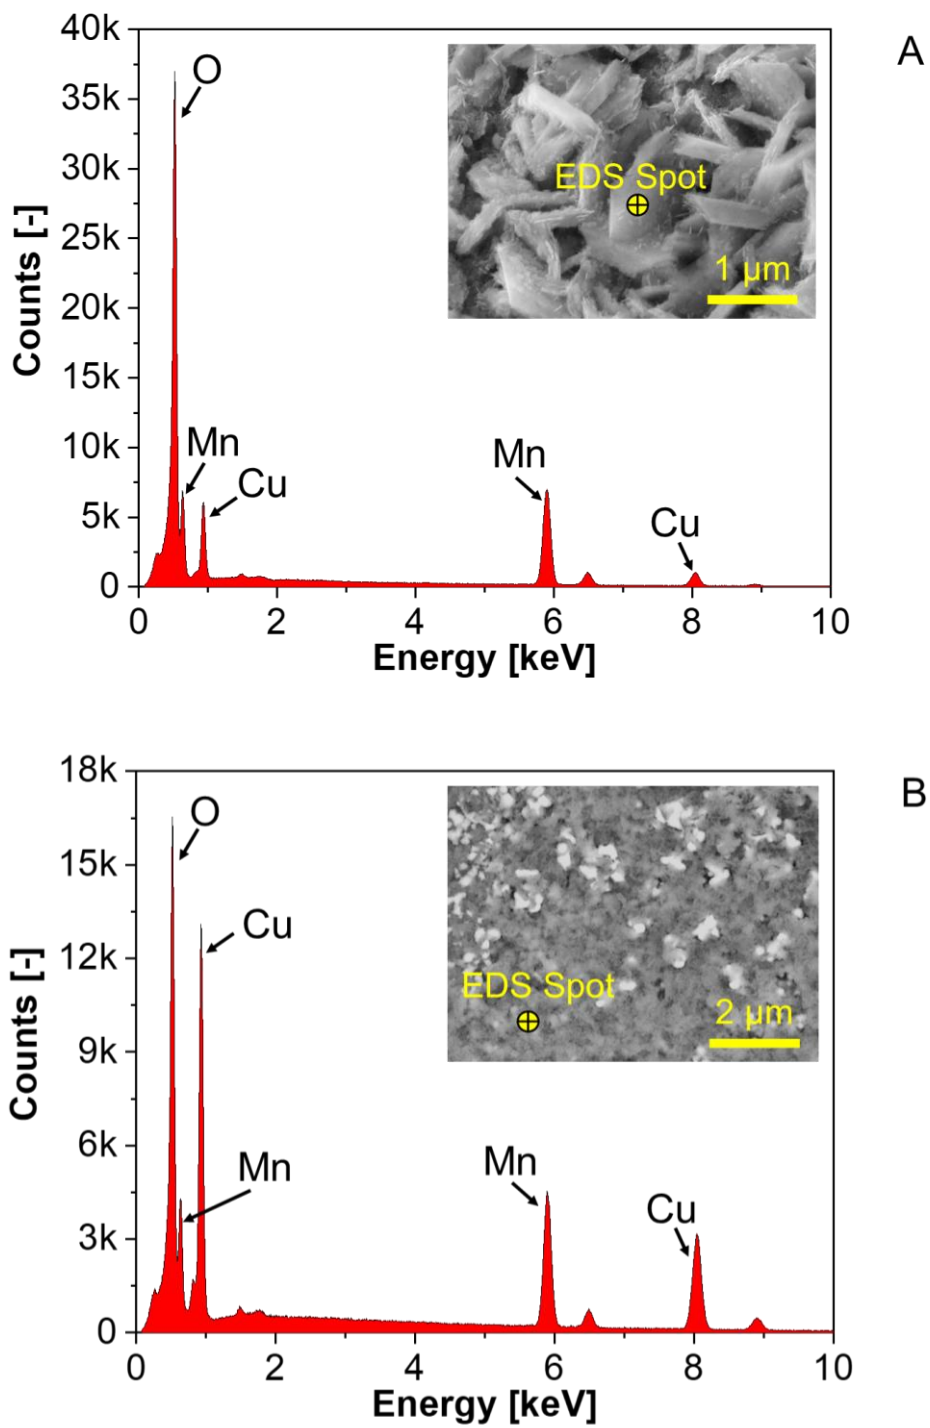

Fig-SI-4: EDS spectra of point analysis on the porous structure for sample M-2. The inset shows the region, which was chosen for the analysis. A represent a spectrum from the platelet-structure, B from a spectrum from the pore structure.
